# Supplementary material for: Characterization of the gut microbiota in Chinese children with overweight and obesity using 16S rRNA gene sequencing
Source: PeerJ journal article supplement (doi:10.7717/peerj.11439), 2021-06-08
Supplement: Raw_Data.zip [file Raw Data.xls]

## Sheet: Sheet1
Class	Number	Name	Gender	Age	BMI	Group	Sequencing number
	1120198		Girl	6	20.3904	3	F30
	1160020		Boy	6	23.8518	3	F7
	1160075		Girl	6	17.6838	2	O33
	1160092		Boy	6	18.639	2	O3
	1160098		Boy	6	19.84	3	F17
	1160101		Boy	6	20.6104	3	F8
	1160114		Girl	6	15.1629	1	N18
	1160125		Boy	6	15.1453	1	N11
	1160131		Boy	6	18.1287	2	O34
	1150011		Boy	7	23.9805	3	F3
	1150022		Boy	7	23.0716	3	F18
	1160005		Boy	7	18.2474	2	O23
	1160008		Boy	7	19.9002	3	F12
	1160014		Boy	7	21.5561	3	F11
	1160030		Girl	7	18.0278	2	O9
	1160031		Girl	7	17.547	2	O28
	1160036		Girl	7	17.3522	2	O13
	1160045		Boy	7	18.2899	2	O17
	1160050		Boy	7	25.5606	3	F15
	1160069		Girl	7	14.7299	1	N10
	1160100		Boy	7	14.784	1	N17
	1160134		Boy	7	18.7489	2	O35
	1160141		Boy	7	15.0296	1	N12
	1160142		Boy	7	25.3642	3	F13
	1160161		Girl	7	14.801	1	N4
	1150005		Boy	8	19.9762	2	O19
	1150024		Boy	8	15.1131	1	N22
	1150026		Boy	8	19.4921	2	O15
	1150038		Girl	8	14.6738	1	N30
	1150043		Girl	8	22.5793	3	F9
	1150044		Girl	8	18.5124	2	O24
	1150059		Boy	8	27.9953	3	F6
	1150076		Girl	8	14.3195	1	N5
	1150078		Girl	8	23.4876	3	F35
	1150085		Girl	8	23.5072	3	F27
	1150088		Girl	8	19.4776	2	O26
	1150093		Girl	8	14.4873	1	N9
	1150096		Boy	8	25.5102	3	F28
	1150102		Boy	8	15.2804	1	N3
	1150119		Boy	8	23.0184	3	F14
	1150128		Girl	8	18.1795	2	O2
	1150130		Girl	8	18.3824	2	O14
	1150170		Girl	8	18.2215	2	O32
	1150173		Girl	8	22.5793	3	F16
	1150178		Girl	8	14.903	1	N2
	1150181		Girl	8	18.2369	2	O16
	1160073		Girl	8	21.3251	3	F19
	1130075		Girl	9	25.0351	3	F32
	1130116		Girl	9	21.7665	3	F10
	1140045		Girl	9	15.3635	1	N29
	1140056		Boy	9	20.3567	2	O18
	1140060		Boy	9	20.0499	2	O12
	1140063		Boy	9	25.0401	3	F1
	1140097		Boy	9	15.0613	1	N23
	1140098		Boy	9	15.1974	1	N28
	1140104		Boy	9	20.17	2	O31
	1140110		Boy	9	25.2522	3	F5
	1140134		Girl	9	19.676	2	O5
	1140170		Girl	9	20.3724	2	O10
	1140173		Girl	9	15.4899	1	N6
	1140186		Girl	9	21.2084	3	F31
	1140190		Boy	9	20.0352	2	O27
	1140205		Boy	9	24.8692	3	F26
	1140233		Girl	9	19.1569	2	O4
	1140235		Girl	9	22.907	3	F4
	1120047		Girl	10	25.3331	3	F2
	1120068		Boy	10	33.0904	3	F23
	1120192		Boy	10	29.9688	3	F29
	1120222		Girl	10	24.4444	3	F21
	1120242		Boy	10	15.5556	1	N27
	1130043		Girl	10	14.5912	1	N29
	1130050		Boy	10	22.1546	2	O8
	1130058		Boy	10	15.753	1	N14
	1130078		Girl	10	15.5285	1	N24
	1130081		Girl	10	15.2987	1	N8
	1130095		Boy	10	15.9193	1	N15
	1130098		Boy	10	25.5588	3	F20
	1130104		Boy	10	20.8526	2	O11
	1130112		Boy	10	25.2801	3	F24
	1130132		Girl	10	21.4952	2	O25
	1130147		Boy	10	21.1109	2	O21
	1130157		Boy	10	31.6443	3	F34
	1130165		Girl	10	23.5575	3	F33
	1120029		Girl	11	27.1816	3	F22
	1120034		Girl	11	22.2204	2	O1
	1120049		Boy	11	15.4975	1	N25
	1120056		Boy	11	15.9505	1	N26
	1120067		Boy	11	15.8418	1	N16
	1120069		Boy	11	15.2355	1	N20
	1120085		Girl	11	16.0701	1	N7
	1120101		Boy	11	22.1003	2	O7
	1120149		Boy	11	22.2034	2	O29
	1120155		Boy	11	22.9817	2	O30
	1120194		Boy	11	22.0748	2	O6
	1120219		Girl	11	15.2714	1	N21
	1120221		Girl	11	15.7031	1	N13
	1120225		Girl	11	22.3596	2	O20
	1120230		Girl	11	15.1156	1	N1
	1120240		Boy	11	23.1421	2	O22
	1130040		Girl	11	24.623	3	F25
